# Supplementary material for: In situ surface reaction induced adhesion force change for mobility control, droplet sorting and bio-detection
Source: Royal Society of Chemistry journal article supplement (doi:10.1039/c2sm26398j), 2012-01-01
Supplement: c2sm26398j.pdf [file c2sm26398j.pdf]

# In-situ surface reaction induced adhesion force change for mobility control, droplets sorting and bio-detection

Xinjie Liu<sup>1,2</sup>, Zhilu Liu<sup>1</sup>, Yongmin Liang<sup>1</sup>, Feng Zhou<sup>1\*</sup>

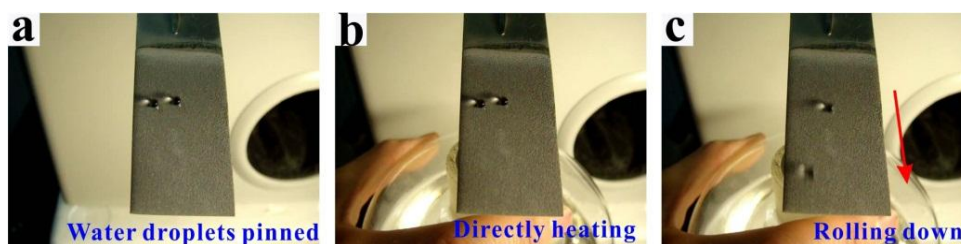

**Supplementary Figure S1.** Digital images of in-situ hot effects induced reversible adhesion by directly heating.

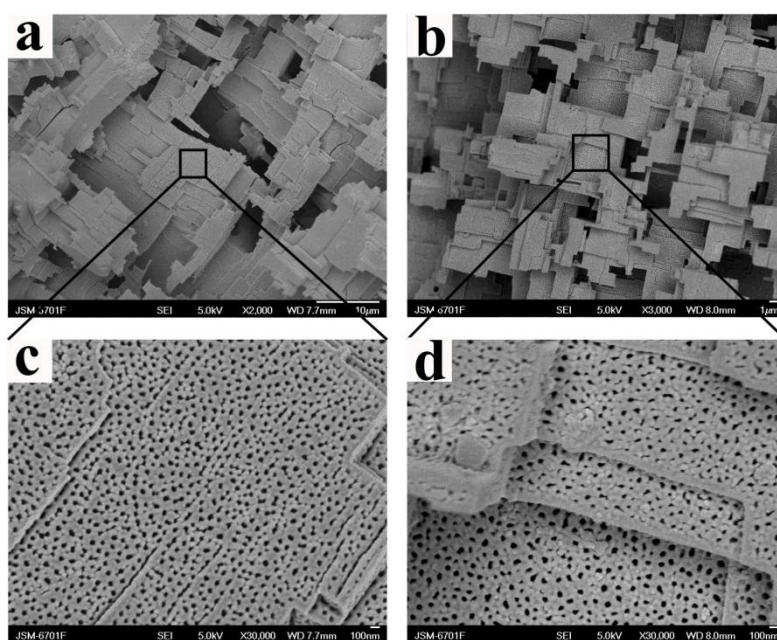

**Supplementary Figure S2.** FE-SEM images of (a) mixed silane modified anodized alumina (APTS/PFTEOS=4:4) and (c) the corresponding biotin grafted anodized alumina (from APTS/PFTEOS=4:4); (c) and (d) are the respective magnified images.
